# Supplementary material for: Increased Intrahepatic Expression of Immune Checkpoint Molecules in Autoimmune Liver Disease
Source: MDPI journal article supplement (doi:10.3390/cells10102671), 2021-10-06
Supplement: s1 [file s1]

Supplementary information

# Increased Intrahepatic Expression of Immune Checkpoint Molecules in Autoimmune Liver Disease

Zuzana Macek Jilkova <sup>1,2,3,4,\*</sup>, Marie Noelle Hilleret <sup>3,4</sup>, Theophile Gerster <sup>3,4</sup>, Nathalie Sturm <sup>1,5</sup>, Marion Mercey-Ressejac <sup>1,2,3</sup>, Jean-Pierre Zarski <sup>1,2,3</sup>, Vincent Leroy <sup>3</sup>, Patrice N. Marche <sup>1,2</sup>, Charlotte Costentin <sup>1,2,3,4</sup> and Thomas Decaens <sup>1,2,3,4,\*</sup>

- <sup>1</sup> Université Grenoble Alpes, 38000 Grenoble, France; NSturm@chu-grenoble.fr (N.S.); mressejac@chu-grenoble.fr (M.M.-R.); jpzarski@chu-grenoble.fr (J.-P.Z.); patrice.marche@univ-grenoble-alpes.fr (P.N.M.); CCostentin@chu-grenoble.fr (C.C.)
  - <sup>2</sup> Institute for Advanced Biosciences, Research Center Inserm U1209, CNRS UMR5309, 38700 La Tronche, France
  - <sup>3</sup> Service d'hépatogastroentérologie, Pôle Digidune, CHU Grenoble Alpes, 38700 La Tronche, France; MNHilleret@chu-grenoble.fr (M.N.H.); tgerster@chu-grenoble.fr (T.G.); vincent.leroy2@aphp.fr (V.L.)
  - <sup>4</sup> Reference Center for Inflammatory Biliary Diseases and Autoimmune Hepatitis (MIVB-H), French Network for Rare Liver Diseases in Children and Adults (FILFOIE), 75012 Paris, France
  - <sup>5</sup> Service d'anatomo-pathologie, Pôle de Biologie, CHU Grenoble Alpes, 38700 La Tronche, France
- \* Correspondence: zmacekjilkova@chu-grenoble.fr (Z.M.J.); tdecaens@chu-grenoble.fr (T.D.)

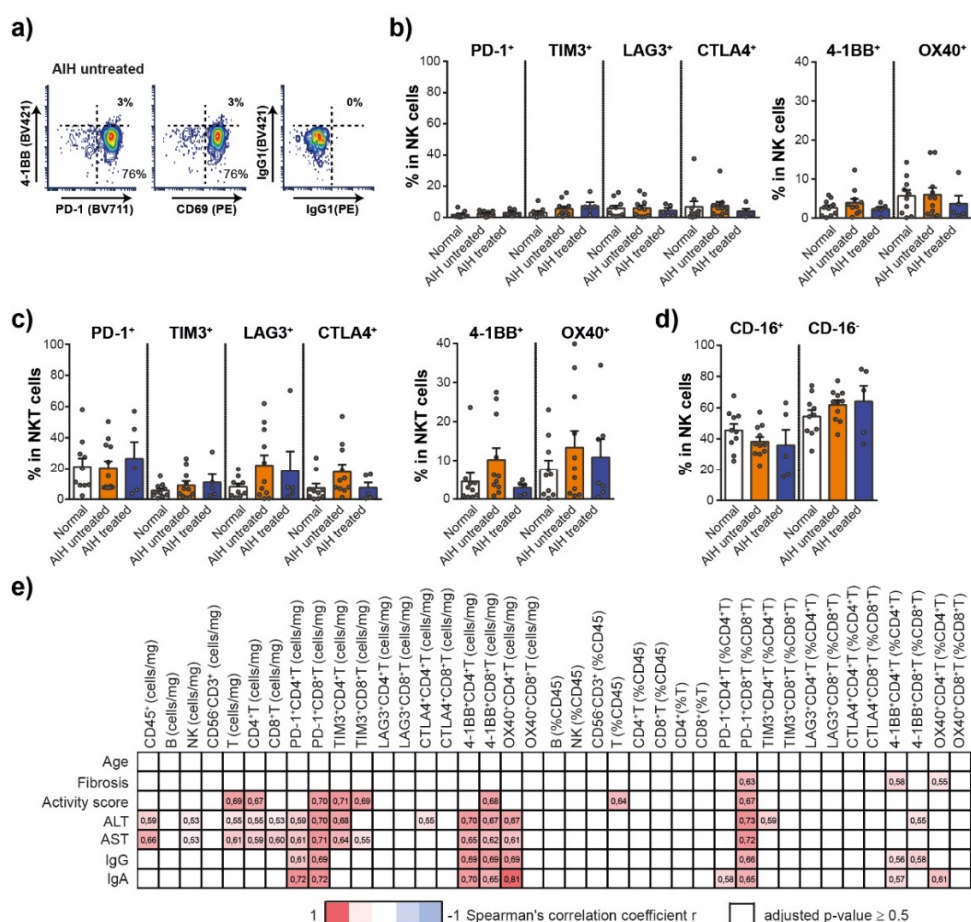

**Supplementary Figure S1.** BB, PD-1 and CD69 in intrahepatic CD8<sup>+</sup> T cells. **(b)** The frequency of intrahepatic immune checkpoint molecule positive NK cells. **(c)** The frequency of intrahepatic immune checkpoint molecule positive NKT (CD56-CD3<sup>+</sup> cells). **(d)** The frequency of CD16- and CD16<sup>+</sup> NK cells. Normal (n = 10), AIH untreated (n = 11) and AIH treated (n = 5). Each circle represents a patient. Data are expressed as mean  $\pm$  SEM. **(e)** Correlation of patient characteristics and intrahepatic lymphocyte characteristics in whole cohort, including Normal (n = 10), AIH untreated (n = 11) and

---

AIH treated ( $n = 5$ ). Only significant correlations (Bonferroni-corrected  $p$  value  $< 0.5$ ) are reported, numbers correspond to Spearman correlation coefficient  $r$ , positive correlation (red), negative correlation (blue).
